# Supplementary material for: Size Effect on Hygroscopicity of Waterlogged Archaeological Wood by Simultaneous Dynamic Vapour Sorption
Source: MDPI journal article supplement (doi:10.3390/f14030519), 2023-03-07
Supplement: s1 [file s1]

Table S1. Standard deviation of EMC of reference samples and WAW samples size at different RH in adsorption process and desorption process

| EMC adsorption |                  |                  |                                    | EMC desorption |                  |                  |                                    |
|----------------|------------------|------------------|------------------------------------|----------------|------------------|------------------|------------------------------------|
| RH             | S <sub>Ref</sub> | S <sub>WAW</sub> | S <sub>WAW</sub> /S <sub>Ref</sub> | RH             | S <sub>Ref</sub> | S <sub>WAW</sub> | S <sub>WAW</sub> /S <sub>Ref</sub> |
| 5              | 0.03077411       | 0.152537375      | 495.67%                            | 5              | 0.244441492      | 0.143292507      | 58.62%                             |
| 10             | 0.084881984      | 0.144049996      | 169.71%                            | 10             | 0.236863771      | 0.151134322      | 63.81%                             |
| 15             | 0.141068374      | 0.141250746      | 100.13%                            | 15             | 0.256459822      | 0.122852506      | 47.90%                             |
| 20             | 0.177990601      | 0.118198464      | 66.41%                             | 20             | 0.280786115      | 0.14620681       | 52.07%                             |
| 25             | 0.201109333      | 0.131442416      | 65.36%                             | 25             | 0.280074196      | 0.119811336      | 42.78%                             |
| 30             | 0.248343425      | 0.119132584      | 47.97%                             | 30             | 0.280879551      | 0.125650644      | 44.73%                             |
| 35             | 0.280879973      | 0.116891174      | 41.62%                             | 35             | 0.309056891      | 0.091201483      | 29.51%                             |
| 40             | 0.292279344      | 0.125690313      | 43.00%                             | 40             | 0.289292251      | 0.094998474      | 32.84%                             |
| 50             | 0.425638729      | 0.128341658      | 30.15%                             | 50             | 0.324283018      | 0.074412288      | 22.95%                             |
| 60             | 0.647617894      | 0.127375371      | 19.67%                             | 60             | 0.344542234      | 0.096764384      | 28.08%                             |
| 70             | 0.917706641      | 0.224320934      | 24.44%                             | 70             | 0.396637725      | 0.174556941      | 44.01%                             |
| 80             | 1.153669392      | 0.280296464      | 24.30%                             | 80             | 0.468277564      | 0.284820793      | 60.82%                             |
| 90             | 1.434002429      | 0.283339341      | 19.76%                             | 90             | 1.073748269      | 0.390481294      | 36.37%                             |
| 95             | 1.842830753      | 0.313352808      | 17.00%                             | 95             | 1.880183913      | 0.327840187      | 17.44%                             |
| 98             | 2.825039367      | 0.357634656      | 12.66%                             | 98             | 2.825039367      | 0.357634656      | 12.66%                             |

Table S2. Standard deviation of parameters for models

|         | $\sigma_{\text{adm0}}$ | $\sigma_{\text{dem0}}$ | $\sigma_k$  | $\sigma_s$  | $\sigma_{1/W}$ |
|---------|------------------------|------------------------|-------------|-------------|----------------|
| Ref     | 0.295202896            | 1.250345052            | 0.012175796 | 11.25910483 | 0.193207533    |
| WAW     | 0.065637261            | 0.366859902            | 0.001581139 | 2.503419881 | 0.042843879    |
| WAW/Ref | 22.23%                 | 29.34%                 | 12.99%      | 22.23%      | 22.18%         |

Table S3. Standard deviation of M<sub>h</sub> value of reference samples and WAW samples size at different RH in adsorption process and desorption process

| Mh adsorption |                  |                  |                                    | Mh desorption |                  |                  |                                    |
|---------------|------------------|------------------|------------------------------------|---------------|------------------|------------------|------------------------------------|
| RH            | S <sub>Ref</sub> | S <sub>WAW</sub> | S <sub>WAW</sub> /S <sub>Ref</sub> | RH            | S <sub>Ref</sub> | S <sub>WAW</sub> | S <sub>WAW</sub> /S <sub>Ref</sub> |
| 5             | 0.131170246      | 0.090713365      | 69.16%                             | 5             | 0.161976409      | 0.159229736      | 98.30%                             |
| 10            | 0.170035253      | 0.120409088      | 70.81%                             | 10            | 0.248705594      | 0.197687242      | 79.49%                             |
| 15            | 0.177737262      | 0.128209135      | 72.13%                             | 15            | 0.295112152      | 0.194879745      | 66.04%                             |
| 20            | 0.174892505      | 0.127366721      | 72.83%                             | 20            | 0.319497636      | 0.177298259      | 55.49%                             |
| 25            | 0.169394339      | 0.123071641      | 72.65%                             | 25            | 0.332061326      | 0.155059303      | 46.70%                             |
| 30            | 0.164371342      | 0.117533914      | 71.51%                             | 30            | 0.338728087      | 0.132360967      | 39.08%                             |
| 35            | 0.160962874      | 0.111744492      | 69.42%                             | 35            | 0.342986885      | 0.111073788      | 32.38%                             |
| 40            | 0.159406146      | 0.106149108      | 66.59%                             | 40            | 0.346869193      | 0.092140729      | 26.56%                             |
| 50            | 0.161064543      | 0.096196993      | 59.73%                             | 50            | 0.357376682      | 0.063858024      | 17.87%                             |
| 60            | 0.166942064      | 0.088106944      | 52.78%                             | 60            | 0.373437562      | 0.052487659      | 14.06%                             |
| 70            | 0.174871675      | 0.081696445      | 46.72%                             | 70            | 0.394383461      | 0.057675938      | 14.62%                             |
| 80            | 0.183505435      | 0.076693096      | 41.79%                             | 80            | 0.418527526      | 0.070798336      | 16.92%                             |
| 90            | 0.192115349      | 0.072806944      | 37.90%                             | 90            | 0.444289939      | 0.085586271      | 19.26%                             |
| 95            | 0.196292761      | 0.071216391      | 36.28%                             | 95            | 0.457399442      | 0.092833084      | 20.30%                             |
| 98            | 0.198742678      | 0.070353288      | 35.40%                             | 98            | 0.465266401      | 0.097062383      | 20.86%                             |

Table S4. Standard deviation of  $M_s$  value of reference samples and WAW samples size at different RH in adsorption process and desorption process

| Ms adsorption |             |             |                   | Mh desorption |             |             |                   |
|---------------|-------------|-------------|-------------------|---------------|-------------|-------------|-------------------|
| RH            | $S_{Ref}$   | $S_{WAW}$   | $S_{WAW}/S_{Ref}$ | RH            | $S_{Ref}$   | $S_{WAW}$   | $S_{WAW}/S_{Ref}$ |
| 5             | 0.016855403 | 0.003023446 | 17.94%            | 5             | 0.009871873 | 0.007558903 | 76.57%            |
| 10            | 0.035400393 | 0.006296497 | 17.79%            | 10            | 0.018285451 | 0.015379637 | 84.11%            |
| 15            | 0.055904974 | 0.009850692 | 17.62%            | 15            | 0.024912685 | 0.023471972 | 94.22%            |
| 20            | 0.078691289 | 0.013727237 | 17.44%            | 20            | 0.029391582 | 0.031815181 | 108.25%           |
| 25            | 0.104147543 | 0.017975033 | 17.26%            | 25            | 0.031473001 | 0.040394957 | 128.35%           |
| 30            | 0.132775512 | 0.022642718 | 17.05%            | 30            | 0.031388101 | 0.049184776 | 156.70%           |
| 35            | 0.16518878  | 0.027813391 | 16.84%            | 35            | 0.031008533 | 0.058140891 | 187.50%           |
| 40            | 0.202178625 | 0.033560402 | 16.60%            | 40            | 0.03599392  | 0.067208204 | 186.72%           |
| 50            | 0.294286231 | 0.047289994 | 16.07%            | 50            | 0.086225559 | 0.085328067 | 98.96%            |
| 60            | 0.421961654 | 0.065196266 | 15.45%            | 60            | 0.206138191 | 0.102713431 | 49.83%            |
| 70            | 0.609659968 | 0.089883078 | 14.74%            | 70            | 0.43348929  | 0.118986423 | 27.45%            |
| 80            | 0.909487647 | 0.127288572 | 14.00%            | 80            | 0.853075059 | 0.13962605  | 16.37%            |
| 90            | 1.452574263 | 0.195288367 | 13.44%            | 90            | 1.649133827 | 0.200744225 | 12.17%            |
| 95            | 1.920578655 | 0.258962059 | 13.48%            | 95            | 2.308426107 | 0.27913197  | 12.09%            |
| 98            | 2.322232997 | 0.319217896 | 13.75%            | 98            | 2.840414638 | 0.355208955 | 12.51%            |

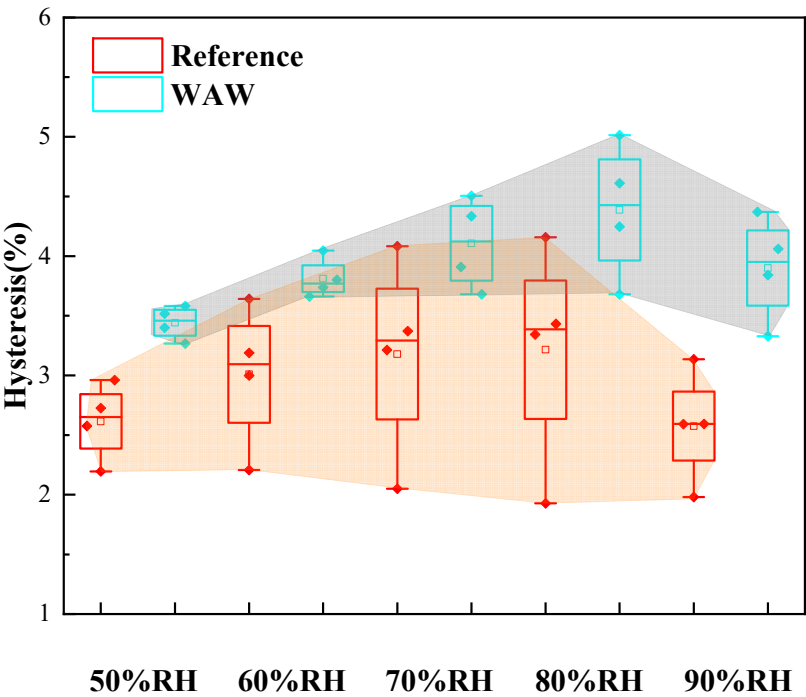

Figure S1. Hysteresis for Reference samples and WAW samples versus RH ranged from 50% to 90%
